# Supplementary material for: The role of ionic liquid pretreatment and recycling design in the sustainability of a biorefinery: a sugarcane to ethanol example
Source: Royal Society of Chemistry journal article supplement (doi:10.1039/d1gc02245h), 2021-01-01
Supplement: d1gc02245h1.pdf [file d1gc02245h1.pdf]

## The Role of Ionic Liquid Pretreatment and Recycle Design in the Sustainability of a Biorefinery: a Sugarcane to Ethanol Example.

*Ferrari, F.A.<sup>a,b</sup>, Nogueira, G.P.<sup>c</sup>, Franco, T.T.<sup>d</sup>, Dias, M.O.S.<sup>g</sup>, Cavaliero C.K.N.<sup>c,e</sup>, Witkamp, G.J.<sup>f</sup>, van der Wielen, L.A.M.<sup>b</sup>, Forte, M.B.S.<sup>a</sup>*

<sup>a</sup>Bioprocess and Metabolic Engineering Laboratory, Department of Food Engineering, Faculty of Food Engineering, University of Campinas (UNICAMP), Monteiro Lobato Street, 80–Zeferino Vaz, Campinas, São Paulo 13083-862, Brazil

<sup>b</sup> Bioprocess Engineering, Biotechnology Department, Faculty of Applied Sciences, Delft University of Technology (TUDelft), Postbus 5, 2600 AA Delft, The Netherlands

<sup>c</sup> Interdisciplinary Center of Energy Planning (NIPE), Cora Coralina 330 Zeferino Vaz, Campinas, São Paulo 13083-896, Brazil

<sup>d</sup> Faculty of Chemical Engineering, University of Campinas (UNICAMP), –Albert Einstein 500 - Zeferino Vaz, Campinas, São Paulo 13083-852, Brazil

<sup>e</sup>Faculty of Mechanical Engineering, University of Campinas (UNICAMP), – Mendeleev 200 - Zeferino Vaz, Campinas, São Paulo 13083-860, Brazil

<sup>f</sup> Water Desalination and Reuse Center (WDRC), Division of Biological and Environmental Science and Engineering (BESE), King Abdullah University of Science and Technology (KAUST), Thuwal 23955-6900, Saudi Arabia

<sup>g</sup> Institute of Science and Technology, Federal University of São Paulo, São Paulo, Brazil

### ***Supplementary Information***

Figure S1: Mass proportion of the three main components during pretreatment at several solid loadings, considering three different biomass moisture, e.g., 50 %w (A), 30 %w (B) and 10 %w (C), and assuming an anhydrous ionic liquid.

Figure S2: Ionic liquid make-up sensibility analysis (Off-Season operation)

Figure S3: Global warming mitigation capacity for the same sugarcane stalk crushing capacity

Figure S4: 2G facility simulation

Figure S5: recycle hierarchy simulation

References

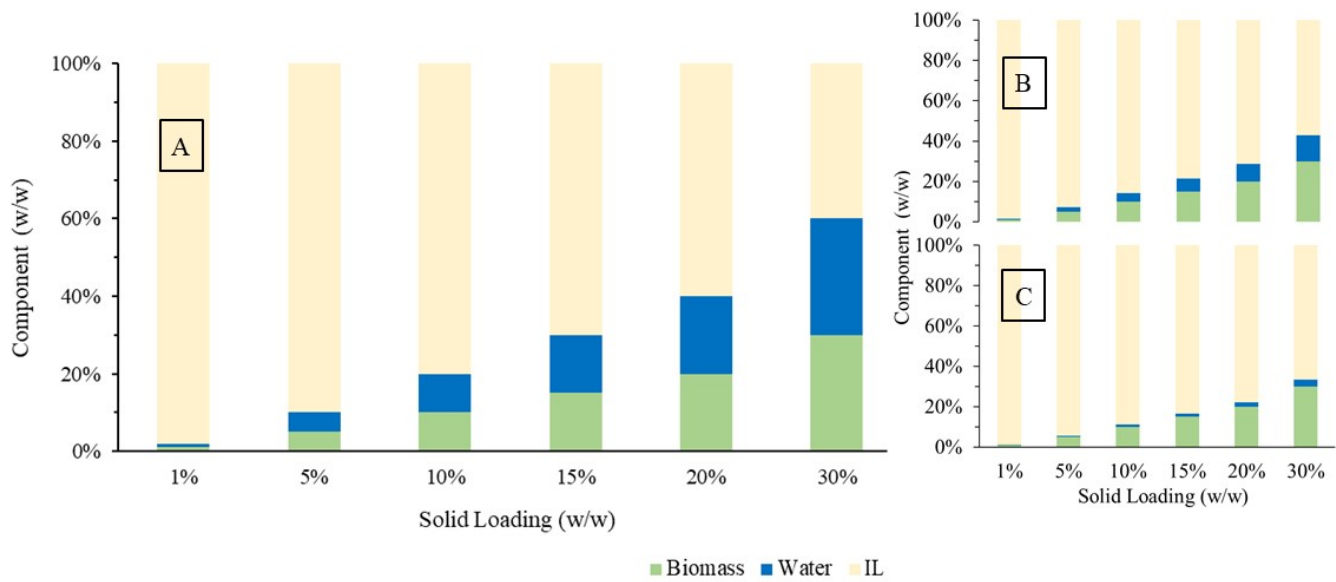

**Fig S1:** Mass proportion of the three main components during pretreatment at several solid loadings, considering three different biomass moisture, e.g., 50 %w (A), 30 %w (B) and 10 %w (C), and assuming an anhydrous ionic liquid.

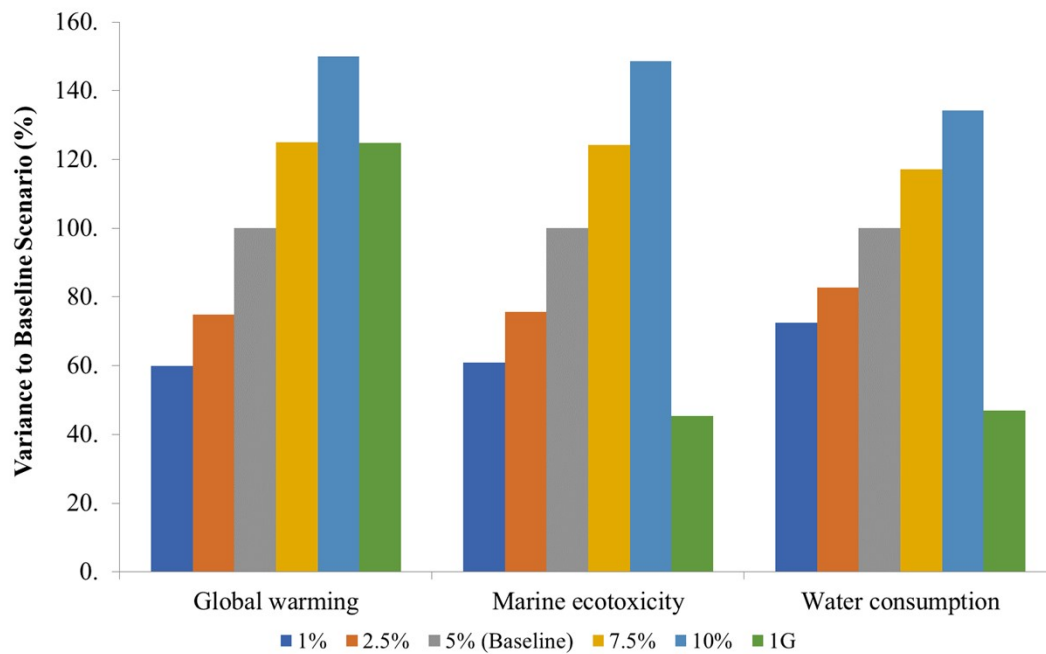

**Fig S2:** Ionic liquid make-up sensibility analysis (Off-Season operation)

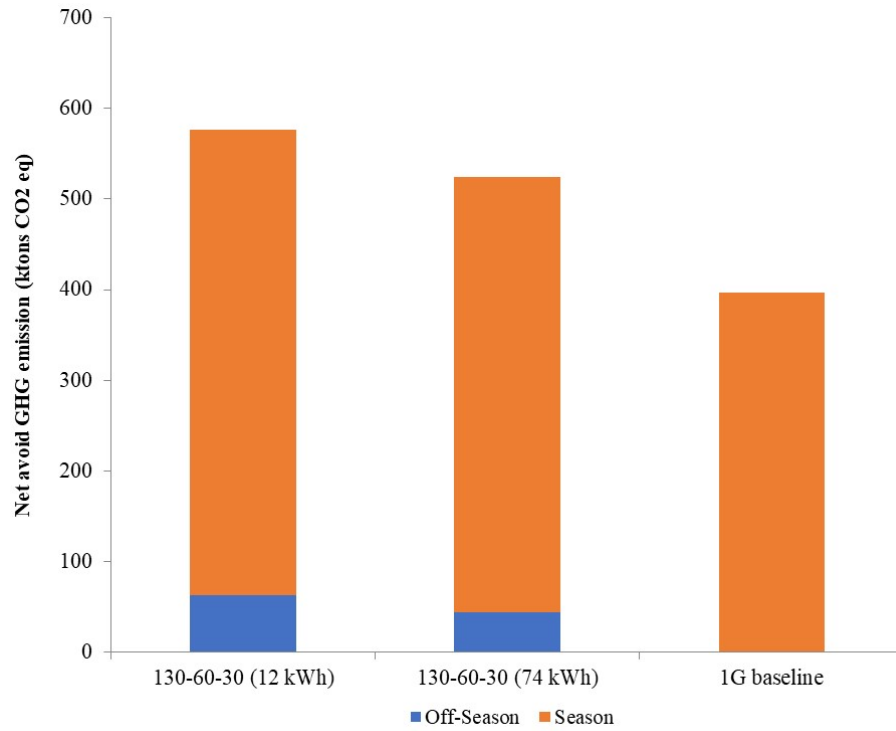

**Fig S3:** Global warming mitigation capacity for the same sugarcane stalk crushing capacity

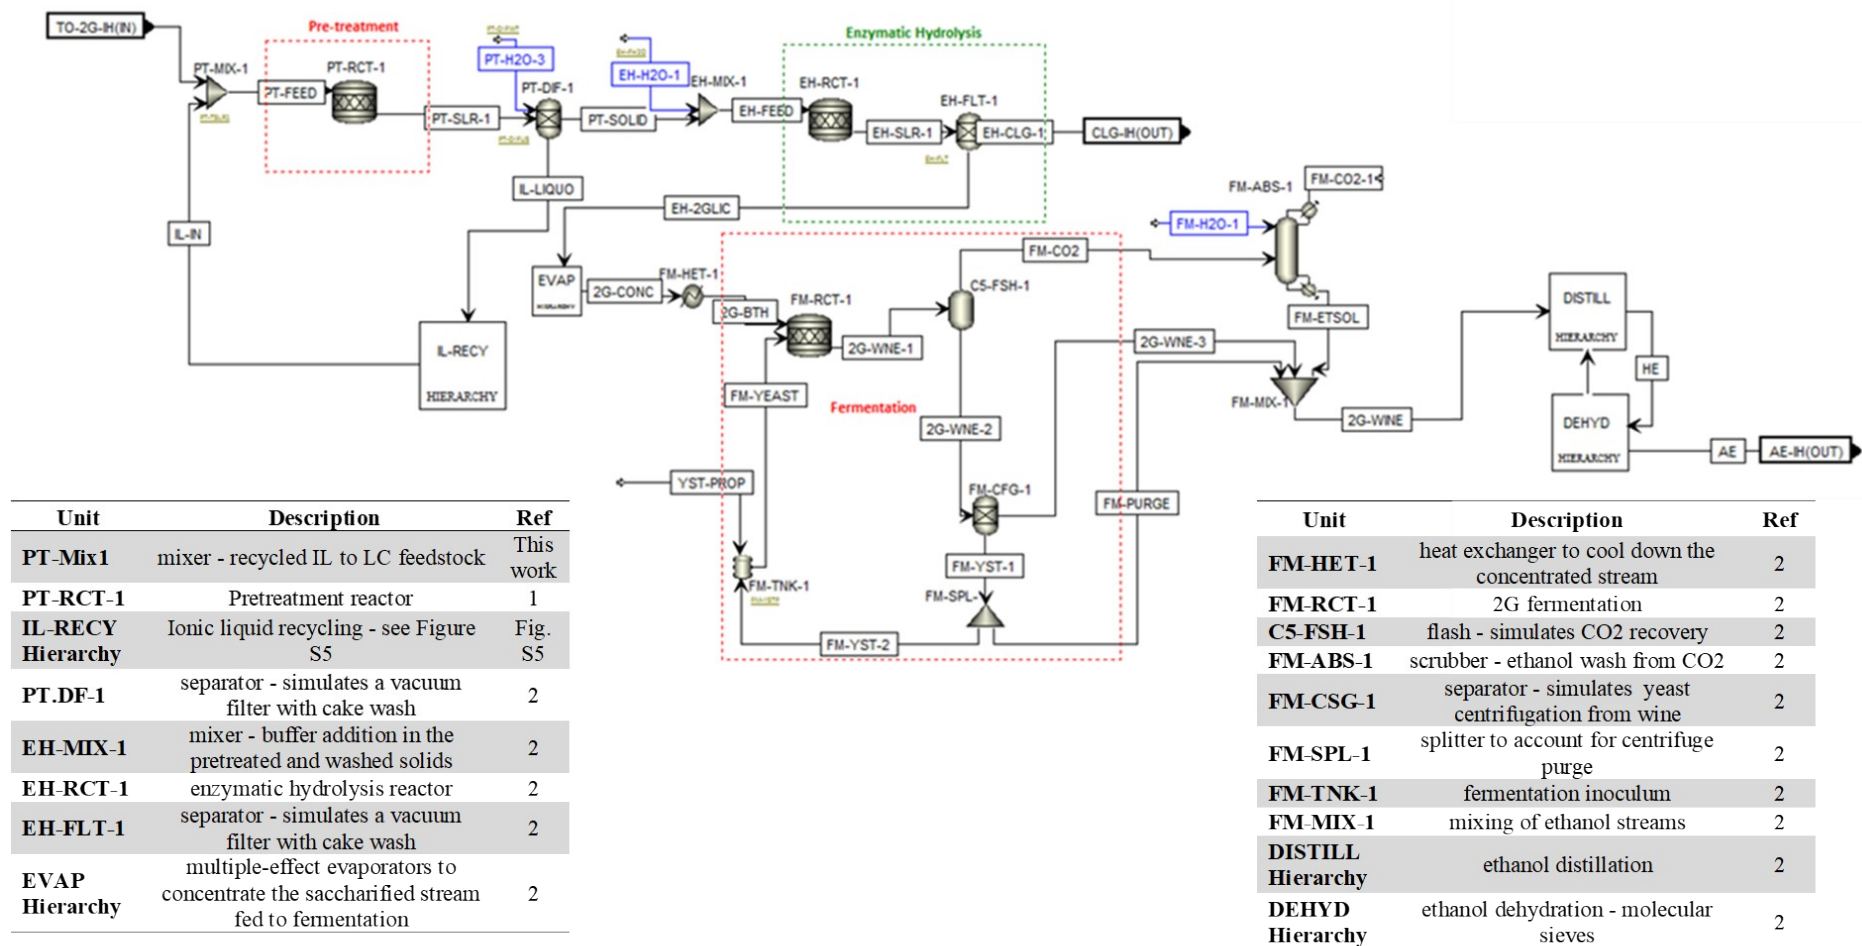

Fig S4: 2G facility used in simulations

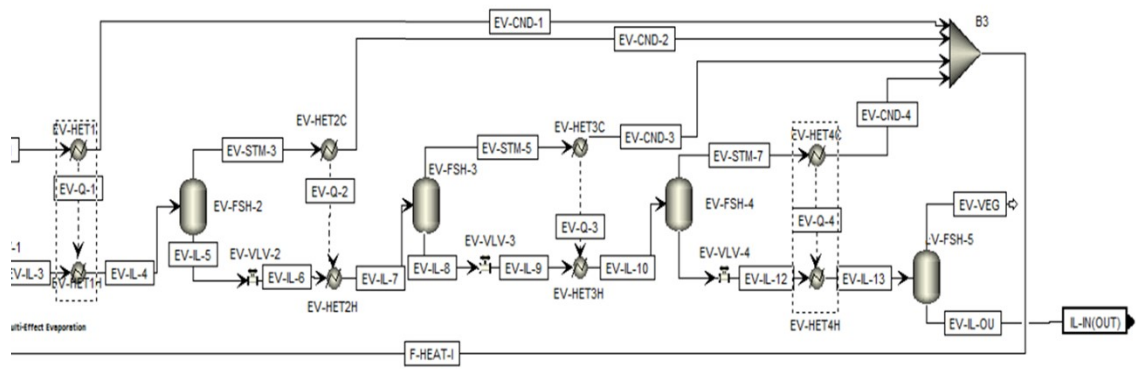

Utility Evaporation

B3

L-IN(OUT)

**Fig S5:** IL recycle hierarchy.

## References

- 1 N. R. Baral and A. Shah, *Biofuels, Bioprod. Biorefining*, 2016, **10**, 70–88.
- 2 A. Bonomi, O. Cavalett, M. Pereira, D. Cunha and M. A. P. Lima Editors, *Virtual Biorefinery An Optimization Strategy for Renewable Carbon Valorization*, Springer International Publishing, Cham, 2016.
- 3 F. Van der Ham, Delft University of Technology, 1999.
- 4 F. A. Ferrari, Delft University of Technology, 2021.
